1 **Title:** Carbon pool trends and dynamics within a subtropical peatland during long-term  
2 restoration.

3

4 Paul Julian II<sup>1</sup>, Stefan Gerber<sup>2</sup>, Alan L. Wright<sup>1</sup>, Binhe Gu<sup>3</sup> and Todd Z. Osborne<sup>2,4</sup>

5 <sup>1</sup> University of Florida, Soil and Water Sciences Department, Ft. Pierce, FL 34945

6 \*Corresponding Author: [pjulian@ufl.edu](mailto:pjulian@ufl.edu); ORCID: 0000-0002-7617-1354

7 <sup>2</sup> University of Florida, Soil and Water Sciences Department, Gainesville, FL, 32611

8 <sup>3</sup> South Florida Water Management District, Water Quality Bureau, West Palm Beach, FL,  
9 33406

10 <sup>4</sup>University of Florida, Whitney Laboratory for Marine Bioscience, St Augustine, FL 32080

11

## 12 **Abstract**

13 **Background:** The Florida Everglades has undergone significant ecological change spanning the  
14 continuum of disturbance to restoration. While the restoration effort is not complete and the  
15 ecosystem continues to experience short duration perturbations, a better understanding of long-  
16 term C dynamics of the Everglades is needed to facilitate new restoration efforts. This study  
17 evaluated temporal trends of different aquatic carbon (C) pools of the northern Everglades  
18 Protection Area over a 20-year period to gauge historic C cycling patterns. Dissolved inorganic  
19 C (DIC), dissolved organic C (DOC), particulate organic C (POC), and surface water carbon  
20 dioxide (pCO<sub>2(aq)</sub>) were investigated between May 1, 1994 and April 30, 2015.

21 **Results:** Annual mean concentrations of DIC, DOC, POC, and pCO<sub>2(aq)</sub> significantly decreased  
22 through time or remained constant across the Water Conservation Areas (WCAs). Overall, the  
23 magnitude of the different C pools in the water column significantly differed between regions.  
24 Outgassing of CO<sub>2</sub> was dynamic across the Everglades ranging from 420 to 2001 kg CO<sub>2</sub> yr<sup>-1</sup>.  
25 Overall the historic trend in CO<sub>2</sub> flux from the marsh declined across our study area while  
26 pCO<sub>2(aq)</sub> largely remained somewhat constant with the exception of Water Conservation Area 2  
27 which experienced significant declines in pCO<sub>2(aq)</sub>. Particulate OC concentrations were  
28 consistent between WCAs, but a significantly decreasing trend in annual POC concentrations  
29 were observed.

30 **Conclusions:** Hydrologic condition and nutrient inputs significantly influenced the balance,  
31 speciation, and flux of C pools across WCAs suggesting a subsidy-stress response in C dynamics  
32 relative to landscape scale responses in nutrient availability. The interplay between nutrient  
33 inputs and hydrologic condition exert a driving force on the balance between DIC and DOC  
34 production via the metabolism of organic matter which forms the base of the aquatic foodweb.  
35 Along the restoration trajectory as water quality and hydrology continues to improve it is  
36 expected that C pools will respond accordingly.

37 **Keywords:** Inorganic carbon, organic carbon, carbon dioxide, particulate carbon, hydrology,  
38 nutrients

### 39 **Introduction**

40 Wetlands, including peatlands, are net C sinks that store a large amount of the global C created  
41 by an unbalanced accumulation of C via plant productivity and export from decomposition of  
42 organic matter via C dioxide (CO<sub>2</sub>) or methane (CH<sub>4</sub>) to the atmosphere. Carbon forms such as  
43 dissolved inorganic C (DIC), particulate organic C (POC) and DOC can be transported laterally  
44 through run-off (Updegraff et al. 1995; Freeman et al. 2004; Billett and Moore 2008), and  
45 contribute to wetlands' carbon budgets. This type of export C, more specifically organic species  
46 from wetlands, represents a significant regional redistribution of terrestrial C and exerts  
47 important controls on aquatic productivity in downstream waterbodies. Dissolved organic and  
48 inorganic C may thereby enter a feedback loop with aquatic productivity within a wetland  
49 (Carpenter and Pace 1997; Hanson et al. 2003).

50 Net aquatic production (NAP), or total metabolic balance of an aquatic ecosystem, is the  
51 difference between gross primary production and ecosystem respiration in the water column. As  
52 a result of maintaining a metabolic balance, different "pools" of aquatic carbon are influenced by  
53 ecosystem processes related to ecosystem metabolism and function. Aquatic ecosystems with  
54 low nutrients such as total phosphorus (TP) and high DOC from either allochthonous (external)  
55 or autochthonous (internal) sources tend to be net heterotrophic, while those exhibiting low DOC  
56 and high TP tend towards net autotrophy (Hanson et al. 2003; Waiser and Roberts 2004).  
57 Therefore, the supply of various C pools and other water quality indicators are important in  
58 understanding ecosystem function.

59 Most wetlands and lake ecosystems are heterotrophic with respect to aquatic metabolism with  
60 surface waters acting as net sources of CO<sub>2</sub> to the atmosphere by decomposition of organic  
61 matter (Kling et al. 1991; Cole et al. 1994; Waiser and Robarts 2004). In contrast, some coastal  
62 wetlands and a small number of lakes are considered autotrophic (Kling et al. 1992; Cole et al.  
63 1994; Duarte and Cebrian 1996; Gu et al. 2011; Hopkinson et al. 2012). The net C source in  
64 wetland and littoral zones could be sustained through C fixation by emergent vegetation and its  
65 subsequent decomposition. Thus, while the surface water may be heterotrophic, the wetland  
66 ecosystem as a whole (water + soil), can still function as a net C sinks resulting in overall C  
67 accretion.

68 The major sources of total dissolved CO<sub>2</sub> contributing to aquatic systems are (1) diffusion of  
69 atmospheric CO<sub>2</sub> from the atmosphere, (2) hydrologic transport from upstream, (3) groundwater  
70 discharge, (4) CO<sub>2</sub> derived from organic matter decomposition within the water column and the  
71 soil and (5) the dissolution of C minerals (Telmer and Veizer 1999; Finlay 2003). In some river  
72 and small stream systems, metabolism of C inputs appears to be greater than *in-situ* primary  
73 production resulting in higher aqueous dissolved CO<sub>2</sub> than CO<sub>2</sub> in the atmosphere (Cole et al.  
74 1994). A total metabolic balance is driven by factors that govern both primary production and  
75 respiration. Productivity can be influenced by nutrients, light availability, thermal cycle,  
76 hydrodynamics (i.e. current, velocity, mixing, etc.), internal loading of organic matter and food  
77 web structure. Meanwhile ecosystem respiration may be strongly subsidized by external loading  
78 of organic matter and nutrients (Odum 1956; Kling et al. 1991; Wetzel 1992; Cole et al. 2000;  
79 Hessen et al. 2004; Elser et al. 2007; Gu et al. 2011). Therefore, the combination and interaction  
80 of these factors influence the partitioning and conversion of C into distinct pools.

81 The objectives of this study were to evaluate different aquatic C pools within the Everglades  
82 ecosystem. The first objective of this study was to evaluate long-term regional trends in aquatic  
83 C (DIC, DOC, POC and  $p\text{CO}_2$ ) within the Everglades as large scale restoration efforts progress  
84 to restore quality, quantity, and timing of water to the Everglades ecosystem. The first hypothesis  
85 is as the system recovers from degraded water quality impacts, C pools will decline or level out.  
86 The decrease may be directly caused by reduced nutrient availability to primary producers and  
87 possibly modified by altered (increasing or decreasing) organic matter turnover in the water  
88 column and soils. The second objective is to estimate  $\text{CO}_2$  flux from the Everglades Protection  
89 Area (EPA) marsh to the atmosphere and investigate long-term trends, with the hypotheses that  
90 aquatic  $\text{CO}_2$  fluxes will also decline concurrently with the decline in other C pools as a response  
91 to restoration.

92

## 93 **Methods**

### 94 *Study Area*

95 The Everglades ecosystem is a complex system of marshes, canals and levees with water control  
96 structures covering approximately 10,000  $\text{km}^2$  of former contiguous Everglades marsh and  
97 currently divided into large, distinct shallow impoundments (Bancroft et al. 1992; Light and  
98 Dineen 1994). Surface water is delivered primarily from the north and west to the EPA through  
99 water control structures connecting the Everglades Agricultural Area (EAA), stormwater  
100 treatment areas (STAs) and the western basins and through urban areas along the eastern edge of  
101 the EPA. Surface water from these land areas are delivered to the EPA through water control  
102 structures, but the timing and distribution of the surface water inflows from the upstream

103 watersheds to the EPA are based on complex series of operational decisions accounting for  
104 natural and environmental system requirements, water supply for urbanized and natural areas,  
105 aquifer recharge, and flood control (Julian et al. 2016).

106 This study was centered on the northern third of the EPA, known as the water conservation areas  
107 (WCAs; Fig. 1) that receive the majority of surface water inputs through the highly managed  
108 surface water system via a combination of canals and water control structures. Water  
109 Conservation Area 1 is unique in the distinct point source inputs of surface water that moves  
110 around the marsh edge via the perimeter canal. As a result of this limited interaction of the  
111 WCA-1 marsh interior with mineral-rich canal drainage water, WCA-1 is the sole remaining  
112 soft-water ecosystem in the Everglades and has a predominately rainfall driven hydrology in the  
113 marsh interior (Newman and Hagerthey 2011). Both WCA-2 and WCA-3 surface hydrology is  
114 controlled by a system of levees and water control structures along the perimeter. Additionally  
115 canals, levees and water control structures bisect WCA-3 effectively dividing the area into four  
116 hydrologically distinct areas (DeBusk et al. 2001; Bruland et al. 2006). Soil within the WCAs are  
117 Histosols, and encompass both Loxahatchee and Everglades peat formations with depths ranging  
118 from ~1 to 2 m with a mosaic of aquatic sloughs, expanses of wet prairie, strands of sawgrass  
119 (*Cladium jamaicense* Crantz), and patches of brush and tree islands (Gleason et al. 1974; Brandt  
120 et al. 2000; DeBusk et al. 2001; Bruland et al. 2006)

#### 121 *Source of Data*

122 Water quality data was retrieved from the South Florida Water Management District (SFWMD)  
123 online database (DBHYDRO; [www.sfwmd.gov/dbhydro](http://www.sfwmd.gov/dbhydro)) for sites within the WCAs identified in  
124 Fig. 1 between water year 1995 to 2015 (May 1, 1994 – April 30, 2015). Only stations with  
125 greater than four samples per year and three years of monitoring data were considered for this

126 analysis resulting in 44 monitoring stations across the EPA. Surface water grab samples were  
127 typically collected between 06:00 to 17:00 local time, with most samples collected at  
128 approximately 09:00. Water quality parameters used include alkalinity, pH, temperature, specific  
129 conductivity, DOC, total phosphorus (TP) and total nitrogen (TN). In order to quantify air-water  
130 net CO<sub>2</sub> exchange between surface waters and the atmosphere additional data on wind speed and  
131 atmospheric CO<sub>2</sub> partial pressure was obtained. Wind speed data measured 10 meters above  
132 ground elevation was retrieved from metrological stations within the EPA identified by Fig. 1.  
133 Monthly atmospheric partial pressure carbon dioxide ( $p\text{CO}_{2(\text{atm})}$ ) data was retrieved from the  
134 National Oceanic & Atmospheric Administration (NOAA) online global monitoring division  
135 webpage ([www.esrl.noaa.gov/gmd](http://www.esrl.noaa.gov/gmd)) using the Key Biscayne monitoring location (25.6654° N,  
136 80.1580° W; NAD1983). Stage elevation data was retrieved from the SFWMD DBHYDRO for  
137 stage monitoring site identified in Fig. 1 between water year (WY) 1979 to 2015 (May 1, 1978 –  
138 April 30, 2015).

139 Water quality data were screened based on laboratory qualifier codes, consistent with FDEP's  
140 quality assurance rule (Florida Administrative Code 2008). Any datum associated with a fatal  
141 qualifier indicating a potential data quality problem were removed from the analysis. For  
142 purposes of data analysis and summary statistics, data reported as less than method detection  
143 limit (MDL) were assigned a value of one-half the MDL, unless otherwise noted.

144

#### 145 *Data Analysis*

146 Dissolved inorganic C concentrations were calculated from the relationship between water  
147 column alkalinity, pH and temperature as outlined by Wetzel and Likens (2000). This  
148 methodology of quantifying DIC concentrations is consistent with previous studies where they

149 determined that the calculated DIC concentration based on alkalinity and relevant parameters can  
150 be used to estimate DIC concentration in the absence of direct measure DIC concentration (Gu et  
151 al. 2008, 2011). Particulate organic C concentration were calculated from the difference between  
152 total organic C (TOC) and DOC. The concentration of dissolved free CO<sub>2</sub> within the water  
153 column were calculated using the pH and CO<sub>2</sub> fraction relationship presented in (Wetzel and  
154 Likens 2000) (Table 1, equation 1). Surface water pCO<sub>2</sub> was calculated using Henry's Law  
155 (Table 1, equation 2) where K<sub>H</sub> is the dissolution constant of CO<sub>2</sub> corrected for water  
156 temperature (Table 1, equation 3). Atmospheric concentration of CO<sub>2</sub> [CO<sub>2(atm)</sub>] above the  
157 stagnant layer were estimated from Henry's Law using monthly atmospheric CO<sub>2</sub> partial  
158 pressure from the Key Biscayne NOAA monitoring location (Table 1, equation 4). Due to the  
159 limited availability of wind data CO<sub>2</sub> flux calculations were limited to a nine-year period  
160 (WY1999 - 2008). During the nine-year period the WCAs experienced changes in climate (i.e.  
161 drought and flood), water quality and system operations due to the construction and operation of  
162 the Everglades Stormwater Treatment Areas. Therefore, to extend the period of record of flux  
163 calculations comparisons of calculations with differences in wind speed data were performed  
164 (Appendix 1). As a result of this comparison, a period of record mean wind speed value of 2.87  
165 m s<sup>-1</sup> was substituted for wind speed in the flux calculations to estimate the flux of CO<sub>2</sub> between  
166 the atmosphere and surface water, equation 5 (Table 1) was used which incorporated CO<sub>2</sub>  
167 diffusion coefficient (Table 1, equation 6) and surface boundary layer thickness (Table 1,  
168 equation 7). For sites with dense macrophyte coverage, it was assumed that the emergent  
169 macrophytes would reduce wind speed at the air-water interface to effectively zero similar to  
170 (Hagerthey et al. 2010). Water column DIC concentrations and surface water pCO<sub>2</sub> (pCO<sub>2(aq)</sub>)  
171 were calculated for all station with the necessary data between WY1995 to WY2015.

172 Regional comparison was conducted using annual mean DIC, DOC, POC and  $p\text{CO}_{2(\text{aq})}$   
173 concentrations for each WCA based on the Florida water year (May-April). Station specific trend  
174 analysis was using Kendall's  $\tau$  correlation analysis and Thiel-Sen's slope estimate (zyp R-  
175 package; (Bronaugh and Werner 2013). Annual mean DIC, DOC, POC,  $p\text{CO}_{2(\text{aq})}$  and  $\text{CO}_2$  flux  
176 were compared between WCAs using the Kruskal-Wallis rank sum test and Dunn's test of  
177 multiple comparisons (Dunn's test R-package) (Dinno 2015) using stations with greater than four  
178 samples collected in a given WY. Annual mean DOC and DIC ratio were computed using mass  
179 per volume concentrations and compared between WCAs using the Kruskal-Wallis rank sum test  
180 and Dunn's test of multiple comparisons. Unless otherwise noted all statistical operations were  
181 performed using the base stats R-package. All statistical operations were performed with R©  
182 (Ver 3.1.2, R Foundation for Statistical Computing, Vienna Austria) at a critical level of  
183 significance of  $\alpha = 0.05$ .

184

## 185 **Results**

186 During this study, calculated DIC concentrations ranged from  $1.9 \text{ mg C L}^{-1}$  to  $144.0 \text{ mg C L}^{-1}$   
187 across the WCAs. Statistically significantly declining annual DIC trends were observed at a total  
188 of 9 stations during this study, no trend was apparent for 32 of the stations during this study, the  
189 remaining didn't have sufficient data to conduct a trend analysis (Fig 2). Most notable  
190 significantly decreasing trends were observed at stations along the primary eutrophication  
191 gradient within WCA-2 where historically untreated stormwater runoff was discharged resulting  
192 in a significant area of impact (DeBusk et al. 2001). Regional annual mean DIC concentrations  
193 between WY1995 and 2015 significantly declined in WCA-2 at a rate of  $-0.53 \text{ mg L}^{-1} \text{ yr}^{-1}$ , no  
194 temporal trend was apparent in WCA-1 and WCA-3 (Table 2). Dissolved inorganic C



195 concentration significantly differed between WCAs ( $\chi^2=54.8$ ,  $df=2$ ,  $\rho<0.001$ ) with DIC  
196 concentration being lowest within WCA-1 ( $17.2 \pm 0.6 \text{ mg C L}^{-1}$ ) and greatest in WCA-2 ( $67.1 \pm$   
197  $0.7 \text{ mg C L}^{-1}$ ) (Fig. 3). Monthly mean DIC and stage elevation was significantly negatively  
198 correlated for WCA-3; negatively correlated with mean monthly water temperature for WCA-2  
199 and WCA-3; positively correlated with mean monthly TP concentration for WCA-1 and WCA-2;  
200 TN and specific conductance for all regions of the study area (Table 4).

201 Dissolved organic C concentrations ranged from  $0.5 \text{ mg C L}^{-1}$  to  $65.9 \text{ mg C L}^{-1}$  across WCAs.  
202 Significantly declining trend were observed at the individual site scale, with a total of 9 sites  
203 with significantly declining trends, meanwhile no trend was apparent for 33 of the stations in this  
204 study (Fig. 2). Regional annual mean DOC concentrations significantly declined in WCA-2 at a  
205 rate of  $-0.37 \text{ mg L}^{-1} \text{ yr}^{-1}$ , no temporal trend was apparent in WCA-1 and WCA-3 (Table 2).  
206 Annual mean DOC concentrations significantly differed between WCAs (Fig. 4,  $\chi^2=41.1$   $df=2$ ,  
207  $\rho<0.01$ ), with WCA-1 and WCA-3 regional concentrations being similar to each other ( $19.4 \pm$   
208  $0.2 \text{ mg C L}^{-1}$  and  $22.1 \pm 0.2 \text{ mg C L}^{-1}$ , respectively) and WCA-2 being different between WCA-1  
209 and WCA-3 with a higher observed regional average DOC concentration ( $35.8 \pm 0.3 \text{ mg C L}^{-1}$ )  
210 (Fig. 3). Monthly mean DOC concentrations were negatively correlated with mean monthly stage  
211 elevations for WCA-2 and WCA-3; no correlated with mean monthly surface water temperature;  
212 positively correlated with TP for WCA-2; and positively correlated with TN and specific  
213 conductivity for all regions (Table 4). Annual mean DOC:DIC values significantly differed  
214 between WCAs (Fig. 5,  $\chi^2=52.8$ ,  $df=2$ ,  $\rho<0.01$ ) with WCA-1 having the highest observed ratio  
215 of  $1.95 \pm 0.07$  followed by WCA-2 ( $0.55 \pm 0.004$ ) and WCA-3 ( $0.46 \pm 0.003$ ).

216 Particulate organic C concentrations ranged from 0 to  $40.3 \text{ mg C L}^{-1}$  across the WCAs.  
217 Significantly declining trends in annual mean POC concentrations were observed at 24 stations,

218 meanwhile no trend was apparent for 9 of the stations in this study (Fig. 3). Regionally annual  
219 mean POC concentrations across all three WCA's significantly declined at a rate of -0.26 to -  
220 0.008 mg C L<sup>-1</sup> yr<sup>-1</sup> (Table 2). Annual mean POC concentrations did not significantly differ  
221 across the WCAs (Fig. 4,  $\chi^2=4.36$ ,  $df=2$ ,  $\rho=0.11$ ), however the multiple comparison test  
222 determined a significant difference of POC concentration between WCA-1 and WCA-2 (z-score  
223 = -2.06,  $\rho<0.05$ ). Regional average concentrations ranging from  $0.7 \pm 0.04$  mg C L<sup>-1</sup> (WCA-1) to  
224  $1.6 \pm 0.20$  mg C L<sup>-1</sup> (WCA-2) with all regions experiencing significantly declining trends (Table  
225 2). Mean monthly POC concentrations were only correlated with monthly mean TP and specific  
226 conductivity for WCA-2 and WCA-3 (Table 4).

227 Calculated  $p\text{CO}_{2(\text{aq})}$  concentrations ranged from 135.0  $\mu\text{atm}$  to 2.1 atm ( $2.1 \times 10^6$   $\mu\text{atm}$ ) across  
228 the WCAs. Significantly declining trends in annual mean  $p\text{CO}_{2(\text{aq})}$  were observed at 7 stations,  
229 while no trend was apparent at 34 stations during the course of this study (Fig. 2). At several  
230 stations, concurrent declines in  $p\text{CO}_{2(\text{aq})}$ , DIC, DOC and POC were observed potentially  
231 indicating a change in C dynamics at these specific locations within the Everglades system.  
232 Regionally annual mean  $p\text{CO}_{2(\text{aq})}$  significantly declined across WCA-2 at a rate of -792  $\mu\text{atm}$   
233 yr<sup>-1</sup> (Table 2) and no significant temporal trend was apparent for WCA-1 and WCA-3 (Table 2).  
234 Annual mean  $p\text{CO}_{2(\text{aq})}$  significantly differed between WCAs (Fig. 4,  $\chi^2=13.4$ ,  $df=2$ ,  $\rho<0.01$ ) with  
235 WCA-2 and WCA-3 being statistically similar (z-score=0.67,  $\rho=0.25$ ; Fig. 4). Annual mean  
236  $p\text{CO}_{2(\text{aq})}$  concentrations followed a decreasing north-to-south trend with WCA-1 having the  
237 greatest concentration ( $52,379 \pm 6,445$   $\mu\text{atm}$ ) and WCA-3 having the lowest concentration  
238 ( $24,963 \pm 983$   $\mu\text{atm}$ ). Mean monthly  $p\text{CO}_{2(\text{aq})}$  were positively correlated with surface water  
239 temperature within WCA-2 and positively correlated with TP for WCA-1 and WCA-2 (Table 4).

240 The calculated water-air CO<sub>2</sub> flux ranged from -6.2 to 36,361 mg m<sup>-2</sup> d<sup>-1</sup> across the WCAs.  
241 Annual mean regional flux range from 285 to 876 mg m<sup>-2</sup> d<sup>-1</sup>. Annual mean CO<sub>2</sub> flux  
242 significantly declined during the course of the study for all regions (Table 2). Similar to pCO<sub>2(aq)</sub>  
243 regional trends, annual mean flux was significantly different between WCAs ( $\chi^2=26.2$ , df=2,  
244  $\rho<0.01$ ) with annual mean flux rates being significantly different between WCA-1 and WCA-2  
245 and WCA-3 and similar between WCA-2 and WCA-3 (z-score=0.008,  $\rho=0.50$ ). Flux rates were  
246 greatest for WCA-1, followed by WCA-2 and WCA-3 (Table 3). Using the area of each region  
247 (WCA-1: 567 km<sup>2</sup>; WCA-2: 537 km<sup>2</sup> and' WCA-3: 2,368 km<sup>2</sup>) and the annual mean daily CO<sub>2</sub>  
248 flux rate extrapolated to an annual estimate for each region an estimated CO<sub>2</sub> flux to the  
249 atmosphere is 1,261 ± 459 kg CO<sub>2</sub> yr<sup>-1</sup> during this study, with the expectation that mass transport  
250 from the marsh will decrease as indicated by the annual CO<sub>2</sub> flux trends.

251 Monthly pCO<sub>2(atm)</sub> concentration ranged from 354 µatm to 404 µatm at the Key Biscayne  
252 monitoring location between WY1995 to WY2015 with a mean ± standard error of 380 ± 0.8  
253 µatm during this period. During this period, WY mean pCO<sub>2(atm)</sub> concentrations significantly  
254 increased ( $\tau=1.00$ ,  $\rho<0.001$ ) during the study at a rate of 2.0 µatm year<sup>-1</sup>.

255

## 256 **Discussion**

### 257 *Dissolved Inorganic Carbon and pCO<sub>2(aq)</sub>*

258 Dissolved inorganic C concentrations were consistent with those reported by (Gu et al. 2008)  
259 who investigated the role of fire on C balance within WCA-2. Across the entire period of record  
260 DIC concentrations gradually decreased both at the regional (Fig. 3 and Table 2) and individual  
261 station scale (Fig. 2) with concurrent changes in water quality systems wide (Julian et al. 2016).

262 Dissolved inorganic C is an essential source of C to benthic macrophytes and other autotrophic  
263 species (Raven et al. 1982; Sand-Jensen and Frost-Christensen 1998). Changes in water column  
264 nutrient concentrations, DIC concentrations, and water quantity influence wetland productivity  
265 which in turn influences biomass turnover, C demand in the aquatic ecosystems, and ecosystem  
266 function (Findlay et al. 2002; Bossio et al. 2006; Corstanje et al. 2007).

267 Each WCA has unique biogeochemical properties and hydrologic dynamics therefore DIC  
268 concentrations and C dynamics observed during this study were expected to vary between WCAs  
269 (Fig. 4). The interior portions of the WCA-1 marsh are hydrologically dominated by rainfall with  
270 very little surface water flows penetrating beyond the outer edge of the marsh (Harvey and  
271 McCormick 2009). This hydrologic setting results in low water column pH, low alkalinity and  
272 oligotrophic conditions with respect to TP (Julian et al. 2016). As such, these conditions allow  
273 for greater flux of CO<sub>2</sub> from the marsh within WCA-1 relative to the other portions of the EPA  
274 presumably due to a combination of organic matter decomposition and dissolution of calcium  
275 carbonate driven by low pH conditions. Meanwhile, a different set of drivers are present for  
276 WCA-2 which historically received large quantities of storm water run-off from the EAA  
277 resulting in large areas considered to be eutrophic (DeBusk et al. 2001). However, hydrologic  
278 restorations efforts and the construction and operation of the Everglades STAs have reduced  
279 storm water inputs and TP into WCA-2 (Julian 2015). Unlike the other two WCAs, WCA-3 is  
280 hydrologically and physically compartmentalized resulting in a mosaic of areas with drastically  
281 different hydroperiods (north versus south), nutrient inputs and cycling patterns (Reddy et al.  
282 1998; Bruland et al. 2006). The strength of the groundwater connection within WCAs is variable  
283 as is the thickness of peat/soil and depth to the lime rock bedrock across the landscape (Scheidt  
284 and Kalla 2007). As in stream ecosystems, wetland DIC is derived from several sources

285 including the dissolution of carbonate, respiration by aquatic plants and heterotrophs by the  
286 consumption of organic matter, shallow groundwater inputs from elevated levels of soil CO<sub>2</sub> and  
287 atmospheric draw-down (Wetzel 1992; Palmer et al. 2001). In some stream ecosystems it has  
288 been observed that DIC is predominately supplied and controlled by drainage of CO<sub>2</sub>-rich  
289 shallow groundwater into the water column (Palmer et al. 2001; Finlay 2003). In wetlands  
290 respiration by aquatic plants and heterotrophs is the dominate source and potential control of  
291 DIC concentrations (Richey et al. 2002; Hagerthey et al. 2010). This DIC source and control  
292 pathway has also been reported for estuarine environments (Raymond et al. 2000). Therefore, in  
293 the Everglades, respiration during the metabolism of organic matter is the primary source of DIC  
294 in surface waters, with organic matter, nutrient gradients and DOC concentrations controlling C  
295 turnover as indicated by the vary large  $p\text{CO}_2(\text{aq})$  concentrations observed (Fig. 3).

296 Odum et al. (1979) hypothesized that in wetlands, plant productivity will be greatest when  
297 periodic short duration flooding provides subsidies of nutrients and water. Alternatively,  
298 prolonged flooding will cause physiological stress to the plants and limit nutrient subsidies thus  
299 limiting productivity. Using this subsidy-stress conceptual model, hydrology as indicated by  
300 hydroperiod is highly variable across the Everglades landscape (Appendix 2, Fig 2) combined  
301 with a strong gradient of available nutrients such as the WCA-2 eutrophication gradient (DeBusk  
302 et al. 2001; Julian et al. 2016). The eutrophication gradient itself is a combination of both “toxic”  
303 and “useable”-inputs as explained by the hypothetical performance curve of a perturbed  
304 ecosystem in this subsidy-stress concept. Useable inputs enhance productivity, alternatively,  
305 toxic inputs causes rapid declines in response to perturbation. Areas nearest the inflow  
306 experience stress from the availability of nutrients with impacts identified by significant shifts in  
307 species composition and biogeochemical processes (Reddy et al. 1993; Qualls and Richardson

308 2000) resulting in a significant decline in oligotrophic indicator species (i.e. sawgrass, calcareous  
309 periphyton) and suitable conditions for eutrophic indicator species (i.e. cattails). Meanwhile,  
310 further along the eutrophication gradient water availability is more dynamic, subsidized by a  
311 significant groundwater connection (Harvey et al. 2002) with nutrient concentrations gradually  
312 reach background concentrations and species composition and productivity return to oligotrophic  
313 conditions corroborated by observed DIC concentrations. Based on these observations the WCA-  
314 2 eutrophication gradient may exhibit subsidy-stress in both time and space and are determined  
315 by “chronic” nutrient availability and hydrologic variability. Likewise, WCA-1 and WCA-3  
316 could also experience subsidy-stress conditions in light of variable hydrology and strong  
317 gradients of nutrient availability.

318 Nutrient availability influences the accretion of organic matter by stimulating net primary  
319 production and decomposition via microbial metabolism which in turn contributed to elevated  
320 DIC production, utilization and turnover (Reddy et al. 1993; Qualls and Richardson 2000; Fisher  
321 and Reddy 2010). Furthermore, the correlation of TN, specific conductance and DIC  
322 concentration (Table 4) could suggest evidence of a nutrient subsidy stimulated DIC production.  
323 Specific conductivity has been used as a tracer of surface water with higher conductivity water  
324 representing higher available nutrient canal water penetrating portions of the marsh while lower  
325 specific conductivity water represents interior marsh surface water with relatively low nutrient  
326 concentrations (Harwell et al. 2008; Surratt et al. 2008). The correlation of TN and DIC could be  
327 linked to the productivity of periphyton and blue-green algae which fix atmospheric nitrogen  
328 during metabolism. Finally, there is a hydrologic factor involved with DIC production as  
329 suggested by the wetland subsidy-stress model of Odum et al. (1979) in that WCA-1 is

330 hydrologically isolated and WCA-3 is hydrologically fractured (i.e. compartmentalized), which  
331 in part regulates ecosystem level productivity, DIC production and carbon turnover (Table 4).

332

### 333 *Dissolved Organic Carbon and Particulate Organic Carbon*

334 Dissolved organic C concentrations during this study were consistent with concentrations  
335 observed in other studies within the Everglades system (Qualls and Richardson 2003; Aiken et  
336 al. 2011; Lu et al. 2014). Wetlands are major sinks of C that sequester  $0.003 - 2.2 \text{ kg C m}^{-2} \text{ yr}^{-1}$ ,  
337 with DOC typically representing <1% of the TOC in soil (i.e. bulk soil + porewater), but ~90%  
338 of the TOC in surface water (Kadlec and Wallace 2009; Kayranli et al. 2010). Particulate organic  
339 C concentrations observed during this study corroborate the consensus that DOC is the dominate  
340 form of organic C in the water column, typically an order of magnitude greater than POC  
341 concentrations (Fig. 4 and Table 3). Furthermore, suspended particulate concentrations in the  
342 interior portions of the EPA are relatively low (Julian et al. 2016), providing more evidence  
343 which suggests that most of the organic C is in the dissolved fraction (Lu et al. 2003).

344 The size of the DOC pool is orders of magnitude larger than the POC pool within the northern  
345 portion of the EPA. Nutrients can be a controlling factor in the production of organic C via  
346 aquatic plant and algae production, and decomposition. Surface water nutrient concentrations  
347 were positively correlated with both DOC and POC (Table 4), suggesting higher primary  
348 productivity in the water column and rates of organic C leaching and litterfall decomposition in  
349 areas of higher nutrients occurs within the Everglades system which correspond to result  
350 presented by previous studies (DeBusk and Reddy 1998; D'Angelo and Reddy 1999; Stern et al.  
351 2007). Additionally, marsh TP concentrations in the WCAs have significantly decreased since

352 WY1979 with WCA-2 having the largest period of record trend decrease (WY1979-WY2015; -  
353  $0.48 \mu\text{g L}^{-1} \text{ yr}^{-1}$ ) in concentrations (Julian et al. 2016). The decrease in nutrient concentrations  
354 also corresponded with significant decreases in DOC, POC, DIC and  $p\text{CO}_2$  (this study; Table 2)  
355 with WCA-2 observing the largest concurrent decreases across the EPA. Availability of nutrients  
356 and electron acceptors plays an important role in wetland C cycling with available nutrients  
357 limiting the growth of microbial fauna (Drake et al. 1996; D'Angelo and Reddy 1999; Wright  
358 and Reddy 2001).

359 While nutrients play an important role in DIC production and C turnover, hydrologic conditions  
360 also play a significant role in the cycling and production of organic C within wetlands. Dissolved  
361 organic C was negatively correlated with stage elevation, suggesting a possible dilution of DOC  
362 within marshes (Table 4). (Lu et al. 2003) observed a similar correlation with DOC in the  
363 southern portion of ENP, suggesting that rainfall diluted DOC concentrations as water levels  
364 increases along flow transects within the Everglades system. This process has also been  
365 demonstrated in other forested and wetland ecosystems (Fraser et al. 2001; Kawasaki et al. 2005;  
366 Ågren et al. 2007). Some studies have attributed this decreases in DOC being caused by flushing  
367 and export of DOC from the system as seen in forested ecosystems (Inamdar et al. 2004).  
368 Additionally, (Lu et al. 2003) observed that canal inflow water is a major source of dissolved  
369 organic matter in wetlands, the majority of which is DOC. As the canal surface water flows  
370 penetrated through marsh DOC is leached from periphyton, vegetation, senescent plant material,  
371 detritus and soil which increased the marsh DOC concentrations. The strong correlation between  
372 DOC and specific conductance provides evidence towards this DOC dynamic (Table 4). Using  
373 radio-isotopes, (Stern et al. 2007) determined that DOC turnover rates are typically longer than  
374 the wetland water residence time, suggesting that most of the DOC will persist in the water



375 column as the water flows. Therefore, the temporal and spatial variation in marsh DOC  
376 concentrations and to some extent POC concentrations are driven in part by the source of water  
377 and factors contributing to the flux of DOC from ecosystem components to the overlying water  
378 column.

379 Particulate OC has been used to estimate carbon burial in oceanic, estuarine, lake and stream  
380 ecosystems (Schindler et al. 1997; Barth et al. 1998; Robertson et al. 1999; Allison et al. 2007).

381 Rivers and streams are net transporters of POC to lake and estuarine ecosystems. In deep lakes  
382 and marine environments POC is an important source of C and quickly mineralized.

383 Accumulation rates can vary several orders of magnitude across systems ranging from  $0.9 \text{ g C m}^{-2}$   
384  $\text{yr}^{-1}$  in riverine tributaries (Kao and Liu 1996) to  $378 \text{ g C m}^{-2} \text{ yr}^{-1}$  in oceanic systems (Suess  
385 1980). As discussed above, DOC is the dominate fraction in wetland ecosystems (Wetzel 1984)  
386 however C accumulation rates in the Everglades is on par with most riverine ecosystems at an  
387 average rate of  $205 \text{ g C m}^{-2} \text{ yr}^{-1}$  (range:  $86 - 424 \text{ g C m}^{-2} \text{ yr}^{-1}$  (Reddy et al. 1993). Although in  
388 river ecosystems, POC concentrations and C accumulation rates can be relatively high due to  
389 allochthonous inputs of C while POC concentrations within the Everglades are relatively low and  
390 C accumulation rates are relatively moderate suggesting dominate authochthonous production of  
391 C.

392

### 393 *Dissolved Inorganic Carbon: Dissolved Organic Carbon Ratio*

394 Each WCA experiences different hydrologic conditions. Some studies have attributed differences  
395 in DOC:DIC ratios as indicators of hydrologic influence on dissolved C flux dynamics in stream  
396 and river ecosystems (Elder et al. 2000; Palmer et al. 2001; Kawasaki et al. 2005). The data

397 suggest that the hydrologic driver is also present in WCAs. Despite similar ecological features  
398 (i.e. ridge and slough), C loads and cycling differ between WCAs (Fig. 4). Furthermore,  
399 DOC:DIC ratios significantly differ between areas with the DOC:DIC ratio for WCA-1 deviating  
400 from WCA-2 and WCA-3 indicating greater DOC concentrations relative to DIC within WCA-1.  
401 Meanwhile, DOC:DIC ratios within WCA-2 and WCA-3 indicate a more balanced dissolved C  
402 flux (Fig. 5) but differ slightly presumably due to differences in water quality conditions (Table  
403 3). The difference of WCA-1 to the other WCAs is primarily attributed to differences in  
404 hydrologic condition with interior portions of WCA-1 receiving very little surface water flow  
405 from canals but rather rainfall, which has low alkalinity concentrations and relatively low pH  
406 (Julian et al. 2016). Meanwhile, WCA-2 and WCA-3 are driven largely by surface water and  
407 groundwater flow (Harvey et al. 2004; Harvey and McCormick 2009).

408 In lake ecosystems decomposition, mineralization and sedimentation processes would reduce  
409 DOC and increase DIC, which would overall decrease the DOC:DIC ratios. Meanwhile, surface  
410 water and groundwater inputs into lakes can potentially increase DOC:DIC ratios depending on  
411 the source and magnitude of flow (Elder et al. 2000). Lake waters are commonly supersaturated  
412 with respect to  $\text{CO}_2$  as a result of  $\text{CO}_2$  generated from the decomposition of organic matter  
413 imported from upstream, resulting in a net flux of C to the atmosphere (Cole et al. 1994, 2001).  
414 A similar process occurs in wetland, wetlands especially the Everglades receive copious  
415 quantities of allochthonous C and produce large quantities of autochthonous C from biomass  
416 turnover therefore allowing the water column to become supersaturated with  $\text{CO}_2$  resulting in  
417 large  $\text{CO}_2$  fluxes (Table 3).

418

419  $\text{CO}_{2(aq)}$  versus  $\text{CO}_{2(atm)}$

420 Over the past century, the mean global  $\text{CO}_{2(\text{atm})}$  has risen from approximately 280  $\mu\text{atm}$  to over  
421 368  $\mu\text{atm}$  (Keeling and Whorf 1994; Baldocchi et al. 2001). Similarly, atmospheric  $\text{CO}_2$   
422 concentrations increases across the study period at the Key Biscayne monitoring location. While  
423 this location is ~60 kilometers from the study location (center of WCA-3 to Key Biscayne),  
424 atmospheric  $\text{CO}_2$  concentrations observed at Key Biscayne are comparable to data collected from  
425 locations within ENP (J.G. Barr, *Unpublished data* and G. Starr, *Unpublished data*) at three  
426 separate monitoring locations with a more limited period of record. In contrast, annual mean  
427  $p\text{CO}_{2(\text{aq})}$  concentrations significantly declined within the WCAs (Table 2). Even though  $p\text{CO}_{2(\text{aq})}$   
428 is orders of magnitude greater than that of the  $p\text{CO}_{2(\text{atm})}$  this diverging relationship is unexpected  
429 and more work is needed to explore to explain this phenomenon.

430 Wetlands release large quantities of C as  $\text{CO}_2$  (Table 3) and methane due to anaerobic conditions  
431 and the decomposition of organic matter. In wetlands, C sequestration typically outpaces C  
432 release making wetland soils the world's largest C sinks (Kayranli et al. 2010). Here, the  
433 difference between  $\text{CO}_{2(\text{aq})}$  versus  $\text{CO}_{2(\text{atm})}$  indicates increasing flux to the atmosphere. This does  
434 not mean that these ecosystems are net sources as this can be compensated by a particulate flux  
435 from emergent vegetation or by allochthonous carbon. However, the temporal pattern suggests  
436 long-term changes.

437 Wetland C reserves are at risk of becoming atmospheric C sources due to changes in climate and  
438 hydrologic conditions (Gorham 1991). Climate change in the form of increased temperatures and  
439 altered precipitation patterns (Kundzewicz et al. 2008; Whitehead et al. 2009) can potentially  
440 decrease wetlands ability to store C. Increased temperatures could stimulate organic matter  
441 decomposition and reduced rainfall and surface water flow into wetlands due to a drier climate  
442 could lead to compaction of organic soils allowing for rapid subsidence (Reddy et al. 2006;

443 Kayranli et al. 2010). If the projected future climate is expected to be drier than past climates,  
444 WCA-1 could be the most affected by climate change due to its isolated hydrology, low DIC and  
445 high CO<sub>2</sub> flux rates. Currently, it is not certain how climate change will influence C storage and  
446 other ecosystem processes of the Everglades and more direct research is needed to explore the  
447 effects of climate change and sea-level rise on C storage and processes in the Everglades  
448 ecosystem.

449

#### 450 *Conclusion*

451 Hydrologic condition, nutrient inputs, and nutrient cycling significantly influence the balance,  
452 speciation, and flux of C from wetland ecosystems consistent with the hypothesized subsidy-  
453 stress model proposed by (Odum et al. 1979) for wetland vegetation. Within the Everglades  
454 ecosystem the interplay between nutrient inputs and hydrologic condition exert a driving force  
455 on the balance between DIC and DOC production via the metabolism of organic matter. As  
456 Everglades restoration efforts progress and water quality continues to improve within the  
457 Everglades ecosystem the C cycle and associated C pools will also respond in kind. More  
458 specifically, impacted portions of the WCAs that have achieved a long-term TP concentration of  
459 10 µg P L<sup>-1</sup> recovering from impacted to unimpacted (Julian 2015) also exhibited significant  
460 declines in DIC concentrations. However, in light of expected climate change (i.e. altered  
461 precipitation, warmer air temperatures, etc.), the mechanisms of C pool control and production  
462 could change as a result of drier climates could significantly impact rainfall driven portions of  
463 the Everglades such as WCA-1. Perhaps future research can identify direct linkages of DOC,  
464 DIC and climate change trends as forecasts for the Everglades Ecosystem.

465

466 *Acknowledgements*

467 We would like to thank the anonymous peer-reviewer(s) and editor(s) for their efforts and  
468 constructive review of this manuscript. Additionally, we would like to acknowledge all of the  
469 current and past South Florida Water Management District staff involved in the collection and  
470 laboratory analysis of the data used in this manuscript.

471 *Conflict of Interest Statement*

472 The authors declare that they have no conflict of interest.

473 *Funding*

474 Support to write this manuscript was provided by the University of Florida Soil and Water  
475 Sciences Wetland Biogeochemistry Laboratory Fellowship.

476 *Authors' Contributions*

477 PJ designed the study, performed data analysis including necessary calculations and statistics  
478 analysis, and wrote the manuscript. SG assisted in data analysis and provided editorial assistance.  
479 BG, ALW and TZO provided substantial editors assistance and review. All authors read and  
480 approved the final manuscript.

481

482 **References**

483 Ågren A, Buffam I, Jansson M, Laudon H (2007) Importance of seasonality and small streams for the  
484 landscape regulation of dissolved organic carbon export. *J Geophys Res Biogeosciences*  
485 112:G03003. doi: 10.1029/2006JG000381

- 486 Aiken GR, Hsu-Kim H, Ryan JN (2011) Influence of Dissolved Organic Matter on the Environmental Fate  
487 of Metals, Nanoparticles, and Colloids. *Environ Sci Technol* 45:3196–3201. doi:  
488 10.1021/es103992s
- 489 Allison MA, Bianchi TS, McKee BA, Sampere TP (2007) Carbon burial on river-dominated continental  
490 shelves: Impact of historical changes in sediment loading adjacent to the Mississippi River.  
491 *Geophys Res Lett* 34:L01606. doi: 10.1029/2006GL028362
- 492 Baldocchi D, Falge E, Gu L, et al (2001) FLUXNET: A New Tool to Study the Temporal and Spatial  
493 Variability of Ecosystem-Scale Carbon Dioxide, Water Vapor, and Energy Flux Densities. *Bull Am*  
494 *Meteorol Soc* 82:2415–2434. doi: 10.1175/1520-0477(2001)082<2415:FANTTS>2.3.CO;2
- 495 Bancroft GT, Hoffman W, Sawicki RJ, Ogden JC (1992) The Importance of the Water Conservation Areas  
496 in the Everglades to the Endangered Wood Stork (*Mycteria americana*). *Conserv Biol* 6:392–398.  
497 doi: 10.1046/j.1523-1739.1992.06030392.x
- 498 Barth JAC, Veizer J, Mayer B (1998) Origin of particulate organic carbon in the upper St. Lawrence:  
499 isotopic constraints. *Earth Planet Sci Lett* 162:111–121. doi: 10.1016/S0012-821X(98)00160-5
- 500 Billett MF, Moore TR (2008) Supersaturation and evasion of CO<sub>2</sub> and CH<sub>4</sub> in surface waters at Mer Bleue  
501 peatland, Canada. *Hydrol Process* 22:2044–2054. doi: 10.1002/hyp.6805
- 502 Bossio DA, Fleck JA, Scow KM, Fujii R (2006) Alteration of soil microbial communities and water quality in  
503 restored wetlands. *Soil Biol Biochem* 38:1223–1233. doi: 10.1016/j.soilbio.2005.09.027
- 504 Brandt LA, Portier KM, Kitchens WM (2000) Patterns of change in tree islands in Arthur R. Marshall  
505 Loxahatchee National Wildlife Refuge from 1950 to 1991. *Wetlands* 20:1–14. doi: 10.1672/0277-  
506 5212(2000)020[0001:POCITI]2.0.CO;2
- 507 Bronaugh DB, Werner A (2013) Zhang + Yue-Pilon trends package. CRAN R-Project
- 508 Bruland GL, Grunwald S, Osborne TZ, et al (2006) Spatial Distribution of Soil Properties in Water  
509 Conservation Area 3 of the Everglades. *Soil Sci Soc Am J* 70:1662. doi: 10.2136/sssaj2005.0134
- 510 Carpenter SR, Pace ML (1997) Dystrophy and Eutrophy in Lake Ecosystems: Implications of Fluctuating  
511 Inputs. *Oikos* 78:3. doi: 10.2307/3545794
- 512 Cole JJ, Caraco NF, Kling GW, Kratz TK (1994) Carbon Dioxide Supersaturation in the Surface Waters of  
513 Lakes. *Science* 265:1568–1570.
- 514 Cole JJ, Cole JJ, Caraco NF, Caraco NF (2001) Carbon in catchments: connecting terrestrial carbon losses  
515 with aquatic metabolism. *Mar Freshw Res* 52:101–110.
- 516 Cole JJ, Pace ML, Carpenter SR, Kitchell JF (2000) Persistence of net heterotrophy in lakes during nutrient  
517 addition and food web manipulations. *Limnol Oceanogr* 45:1718–1730. doi:  
518 10.4319/lo.2000.45.8.1718
- 519 Corstanje R, Reddy KR, Prenger JP, et al (2007) Soil microbial eco-physiological response to nutrient  
520 enrichment in a sub-tropical wetland. *Ecol Indic* 7:277–289. doi: 10.1016/j.ecolind.2006.02.002

- 521 D'Angelo EM, Reddy KR (1999) Regulators of heterotrophic microbial potentials in wetland soils. *Soil Biol*  
522 *Biochem* 31:815–830. doi: 10.1016/S0038-0717(98)00181-3
- 523 DeBusk WF, Newman S, Reddy KR (2001) Spatio-temporal patterns of soil phosphorus enrichment in  
524 Everglades Water Conservation Area 2A. *J Environ Qual* 30:1438–1446.
- 525 DeBusk WF, Reddy KR (1998) Turnover of detrital organic carbon in a nutrient-impacted Everglades  
526 marsh. *Soil Sci Soc Am J* 62:1460–1468.
- 527 Dinno A (2015) Dunn's test of multiple comparisons using rank sums. CRAN R-Project
- 528 Drake HL, Aumen NG, Kuhner C, et al (1996) Anaerobic Microflora of Everglades Sediments: Effects of  
529 Nutrients on Population Profiles and Activities. *Appl Environ Microbiol* 62:486–493.
- 530 Duarte CM, Cebrian J (1996) The fate of marine autotrophic production. *Limnol Oceanogr* 41:1758–  
531 1766.
- 532 Elder JF, Rybicki NB, Carter V, Weintraub V (2000) Sources and yields of dissolved carbon in northern  
533 Wisconsin stream catchments with differing amounts of peatland. *Wetlands* 20:113–125. doi:  
534 10.1672/0277-5212(2000)020[0113:SAYODC]2.0.CO;2
- 535 Elser JJ, Bracken MES, Cleland EE, et al (2007) Global analysis of nitrogen and phosphorus limitation of  
536 primary producers in freshwater, marine and terrestrial ecosystems. *Ecol Lett* 10:1135–1142.  
537 doi: 10.1111/j.1461-0248.2007.01113.x
- 538 Findlay SEG, Dye S, Kuehn KA (2002) Microbial growth and nitrogen retention in litter of *Phragmites*  
539 *australis* compared to *Typha angustifolia*. *Wetlands* 22:616–625. doi: 10.1672/0277-  
540 5212(2002)022[0616:MGANRI]2.0.CO;2
- 541 Finlay JC (2003) Controls of streamwater dissolved inorganic carbon dynamics in a forested watershed.  
542 *Biogeochemistry* 62:231–252. doi: 10.1023/A:1021183023963
- 543 Fisher MM, Reddy KR (2010) Estimating the Stability of Organic Phosphorus in Wetland Soils. *Soil Sci Soc*  
544 *Am J* 74:1398. doi: 10.2136/sssaj2009.0268
- 545 Florida Administrative Code (2008) Chapter 62-160 Quality Assurance.
- 546 Fraser CJD, Roulet NT, Moore TR (2001) Hydrology and dissolved organic carbon biogeochemistry in an  
547 ombrotrophic bog. *Hydrol Process* 15:3151–3166. doi: 10.1002/hyp.322
- 548 Freeman C, Fenner N, Ostle NJ, et al (2004) Export of dissolved organic carbon from peatlands under  
549 elevated carbon dioxide levels. *Nature* 430:195–198. doi: 10.1038/nature02707
- 550 Gleason PJ, Cohen AD, Smith WG, et al (1974) The environmental significance of Holocene sediments  
551 from the Everglades and saline tidal plain. In: *Environments of south Florida: Present and past*.  
552 *Miami Geological Society: Coral Gables, FL*, pp 287–341
- 553 Gorham E (1991) Northern peatlands: role in the carbon cycle and probable responses to climatic  
554 warming. *Ecol Appl* 1:182–195.

- 555 Gu B, Miao S, Edelstein C, Dreschel T (2008) Effects of a prescribed fire on dissolved inorganic carbon  
556 dynamics in a nutrient-enriched Everglades wetland. *Fundam Appl Limnol Arch Für Hydrobiol*  
557 171:263–272. doi: 10.1127/1863-9135/2008/0171-0263
- 558 Gu B, Schelske CL, Coveney MF (2011) Low carbon dioxide partial pressure in a productive subtropical  
559 lake. *Aquat Sci* 73:317–330. doi: 10.1007/s00027-010-0179-y
- 560 Hagerthey SE, Cole JJ, Kilbane D (2010) Aquatic metabolism in the Everglades: Dominance of water  
561 column heterotrophy. *Limnol Oceanogr* 55:653–666.
- 562 Hanson PC, Bade DL, Carpenter SR, Kratz TK (2003) Lake metabolism: Relationships with dissolved  
563 organic carbon and phosphorus. *Limnol Oceanogr* 48:1112–1119. doi:  
564 10.4319/lo.2003.48.3.1112
- 565 Harvey JW, Krupa SL, Gefvery C, et al (2002) Interactions between surface water and groundwater  
566 effects on mercury transport in the north-central Everglades. United States Geological Survey,  
567 Reston, VA
- 568 Harvey JW, Krupa SL, Krest JM (2004) Ground Water Recharge and Discharge in the Central Everglades.  
569 *Ground Water* 42:1090–1102. doi: 10.1111/j.1745-6584.2004.tb02646.x
- 570 Harvey JW, McCormick PV (2009) Groundwater's significance to changing hydrology, water chemistry,  
571 and biological communities of a floodplain ecosystem, Everglades, South Florida, USA.  
572 *Hydrogeol J* 17:185–201. doi: 10.1007/s10040-008-0379-x
- 573 Harwell MC, Surratt DD, Barone DM, Aumen NG (2008) Conductivity as a tracer of agricultural and urban  
574 runoff to delineate water quality impacts in the northern Everglades. *Environ Monit Assess*  
575 147:445–462. doi: 10.1007/s10661-007-0131-3
- 576 Hessen DO, Ågren GI, Anderson TR, et al (2004) Carbon sequestration in ecosystems: the role of  
577 stoichiometry. *Ecology* 85:1179–1192. doi: 10.1890/02-0251
- 578 Hopkinson CS, Cai W-J, Hu X (2012) Carbon sequestration in wetland dominated coastal systems — a  
579 global sink of rapidly diminishing magnitude. *Curr Opin Environ Sustain* 4:186–194. doi:  
580 10.1016/j.cosust.2012.03.005
- 581 Inamdar SP, Christopher SF, Mitchell MJ (2004) Export mechanisms for dissolved organic carbon and  
582 nitrate during summer storm events in a glaciated forested catchment in New York, USA. *Hydrol*  
583 *Process* 18:2651–2661. doi: 10.1002/hyp.5572
- 584 Julian P (2015) Appendix 3A-6: Water Year 2010-2014 annual total phosphorus criteria compliance  
585 assessment. In: 2015 South Florida Environmental Report. South Florida Water Management  
586 District, West Palm Beach, FL,
- 587 Julian P, Payne GG, Xue SK (2016) Chapter 3A: Water Quality in the Everglades Protection Areas. In: 2016  
588 South Florida Environmental Report. South Florida Water Management District, West Palm  
589 Beach, FL,
- 590 Kadlec RH, Wallace SD (2009) *Treatment wetlands*. CRC Press, Boca Raton, FL



- 591 Kao S-J, Liu K-K (1996) Particulate organic carbon export from a subtropical mountainous river (Lanyang  
592 Hsi) in Taiwan. *Limnol Oceanogr* 41:1749–1757. doi: 10.4319/lo.1996.41.8.1749
- 593 Kawasaki M, Ohte N, Katsuyama M (2005) Biogeochemical and hydrological controls on carbon export  
594 from a forested catchment in central Japan. *Ecol Res* 20:347–358. doi: 10.1007/s11284-005-  
595 0050-0
- 596 Kayranli B, Scholz M, Mustafa A, Hedmark Å (2010) Carbon Storage and Fluxes within Freshwater  
597 Wetlands: a Critical Review. *Wetlands* 30:111–124. doi: 10.1007/s13157-009-0003-4
- 598 Keeling CD, Whorf TP (1994) Atmospheric CO<sub>2</sub> records from sites in the SIO air sampling network,  
599 Trends' 93: A Compendium of Data on Global Change TA Boden, et al. Rep. Oak Ridge National  
600 Laboratory, Oak Ridge, Tennessee
- 601 Kling GW, Kipphut GW, Miller MC (1991) Arctic Lakes and Streams as Gas Conduits to the Atmosphere:  
602 Implications for Tundra Carbon Budgets. *Science* 251:298.
- 603 Kling GW, Kipphut GW, Miller MC (1992) The flux of CO<sub>2</sub> and CH<sub>4</sub> from lakes and rivers in arctic Alaska.  
604 *Hydrobiologia* 240:23–36. doi: 10.1007/BF00013449
- 605 Kundzewicz ZW, Mata LJ, Arnell NW, et al (2008) The implications of projected climate change for  
606 freshwater resources and their management. *Hydrol Sci J* 53:3–10. doi: 10.1623/hysj.53.1.3
- 607 Light SS, Dineen JW (1994) Water control in the everglades: a historical perspective. In: Davis S, Ogden J  
608 (eds) *Everglades: The ecosystem and its restoration*. St. Lucie Press, Delray Beach, FL, pp 47–84
- 609 Lu H, Yang L, Shabbir S, Wu Y (2014) The adsorption process during inorganic phosphorus removal by  
610 cultured periphyton. *Environ Sci Pollut Res* 21:8782–8791. doi: 10.1007/s11356-014-2813-z
- 611 Lu XQ, Maie N, Hanna JV, et al (2003) Molecular characterization of dissolved organic matter in  
612 freshwater wetlands of the Florida Everglades. *Water Res* 37:2599–2606. doi: 10.1016/S0043-  
613 1354(03)00081-2
- 614 Newman S, Hagerthey SE (2011) Water Conservation Area 1: A Case Study of Hydrology, Nutrient, and  
615 Mineral Influences on Biogeochemical Processes. *Crit Rev Environ Sci Technol* 41:702–722. doi:  
616 10.1080/10643389.2010.530910
- 617 Odum EP, Finn JT, Franz EH (1979) Perturbation Theory and the Subsidy-Stress Gradient. *BioScience*  
618 29:349–352. doi: 10.2307/1307690
- 619 Odum HT (1956) Primary production in flowing waters. *Limnol Ocean* 1:102–117.
- 620 Palmer SM, Hope D, Billett MF, et al (2001) Sources of organic and inorganic carbon in a headwater  
621 stream: Evidence from carbon isotope studies. *Biogeochemistry* 52:321–338. doi:  
622 10.1023/A:1006447706565
- 623 Qualls RG, Richardson CJ (2000) Phosphorus enrichment affects litter decomposition, immobilization,  
624 and soil microbial phosphorus in wetland mesocosms. *Soil Sci Soc Am J* 64:799–808.

- 625 Qualls RG, Richardson CJ (2003) Factors controlling concentration, export, and decomposition of  
626 dissolved organic nutrients in the Everglades of Florida. *Biogeochemistry* 62:197–229. doi:  
627 10.1023/A:1021150503664
- 628 Raven J, Beardall J, Griffiths H (1982) Inorganic C-sources for *Lemanea*, *Cladophora* and *Ranunculus* in a  
629 fast-flowing stream: Measurements of gas exchange and of carbon isotope ratio and their  
630 ecological implications. *Oecologia* 53:68–78. doi: 10.1007/BF00377138
- 631 Raymond PA, Bauer JE, Cole JJ (2000) Atmospheric CO<sub>2</sub> evasion, dissolved inorganic carbon production,  
632 and net heterotrophy in the York River estuary. *Limnol Oceanogr* 45:1707–1717. doi:  
633 10.4319/lo.2000.45.8.1707
- 634 Reddy KR, DeLaune RD, DeBusk WF, Koch MS (1993) Long-term nutrient accumulation rates in the  
635 Everglades. *Soil Sci Soc Am J* 57:1147–1155.
- 636 Reddy KR, Osborne TZ, Inglett KS, Corstanje R (2006) Influence of water levels on subsidence of organic  
637 soils in the upper St. Johns River Basin. Saint Johns River Water Management District, Palatka, FL  
638 USA
- 639 Reddy KR, Wang Y, DeBusk WF, et al (1998) Forms of soil phosphorus in selected hydrologic units of the  
640 Florida Everglades. *Soil Sci Soc Am J* 62:1134–1147.
- 641 Richey JE, Melack JM, Aufdenkampe AK, et al (2002) Outgassing from Amazonian rivers and wetlands as  
642 a large tropical source of atmospheric CO<sub>2</sub>. *Nature* 416:617–620. doi: 10.1038/416617a
- 643 Robertson AI, Bunn SE, Boon PI, Walker KF (1999) Sources, sinks and transformations of organic carbon  
644 in Australian floodplain rivers. *Mar Freshw Res* 50:813. doi: 10.1071/MF99112
- 645 Sand-Jensen K, Frost-Christensen H (1998) Photosynthesis of amphibious and obligately submerged  
646 plants in CO<sub>2</sub>-rich lowland streams. *Oecologia* 117:31–39. doi: 10.1007/s004420050628
- 647 Scheidt D, Kalla PI (2007) Everglades ecosystem assessment: water management and quality,  
648 eutrophication, mercury contamination, soil and habitat: monitoring for adaptive management:  
649 a R-EMAP status report. United States Environmental Protection Agency, Athens, GA
- 650 Schindler DW, Curtis PJ, Bayley SE, et al (1997) Climate-Induced Changes in the Dissolved Organic Carbon  
651 Budgets of Boreal Lakes. *Biogeochemistry* 36:9–28.
- 652 Stern J, Wang Y, Gu B, Newman J (2007) Distribution and turnover of carbon in natural and constructed  
653 wetlands in the Florida Everglades. *Appl Geochem* 22:1936–1948. doi:  
654 10.1016/j.apgeochem.2007.04.007
- 655 Suess E (1980) Particulate organic carbon flux in the oceans—surface. *Nature* 288:261.
- 656 Surratt DD, Waldon MG, Harwell MC, Aumen NG (2008) Time-series and spatial tracking of polluted  
657 canal water intrusion into wetlands of a National Wildlife Refuge in Florida, USA. *Wetlands*  
658 28:176–183. doi: 10.1672/07-74.1

- 659 Telmer K, Veizer J (1999) Carbon fluxes, pCO<sub>2</sub> and substrate weathering in a large northern river basin,  
660 Canada: carbon isotope perspectives. *Chem Geol* 159:61–86. doi: 10.1016/S0009-  
661 2541(99)00034-0
- 662 Updegraff K, Pastor J, Bridgham SD, Johnston CA (1995) Environmental and Substrate Controls over  
663 Carbon and Nitrogen Mineralization in Northern Wetlands. *Ecol Appl* 5:151–163. doi:  
664 10.2307/1942060
- 665 Waiser M, Robarts R (2004) Net heterotrophy in productive prairie wetlands with high DOC  
666 concentrations. *Aquat Microb Ecol* 34:279–290. doi: 10.3354/ame034279
- 667 Wetzel RG (1992) Gradient-dominated ecosystems: sources and regulatory functions of dissolved  
668 organic matter in freshwater ecosystems. In: Salonen K, Kairesalo T, Jones RI (eds) *Dissolved*  
669 *Organic Matter in Lacustrine Ecosystems*. Springer Netherlands, pp 181–198
- 670 Wetzel RG (1984) Detrital Dissolved and Particulate Organic Carbon Functions in Aquatic Ecosystems.  
671 *Bull Mar Sci* 35:503–509.
- 672 Wetzel RG, Likens GE (2000) The Inorganic Carbon Complex: Alkalinity, Acidity, CO<sub>2</sub>, pH, Total Inorganic  
673 Carbon, Hardness, Aluminum. In: *Limnological Analyses*. Springer New York, pp 113–135
- 674 Whitehead PG, Wilby RL, Battarbee RW, et al (2009) A review of the potential impacts of climate change  
675 on surface water quality. *Hydrol Sci J* 54:101–123. doi: 10.1623/hysj.54.1.101
- 676 Wright AL, Reddy KR (2001) Heterotrophic Microbial Activity in Northern Everglades Wetland Soils. *Soil*  
677 *Sci Soc Am J* 65:1856. doi: 10.2136/sssaj2001.1856
- 678

679 **Figures and Tables**

680 Fig. 1. Map of surface water quality, stage and weather monitoring location within the Everglades  
681 Protection Area relative to surrounding features including the Everglades Stormwater Treatment Area,  
682 Everglades Agricultural Area and Water Conservation Areas.

683 Fig. 2. Annual Kendall trend analysis results for each monitoring location with enough data (greater than  
684 six samples per year and three water years) for dissolved inorganic carbon, dissolved organic carbon,  
685 particulate organic carbon and surface water  $p\text{CO}_2$  ( $p\text{CO}_{2(\text{aq})}$ ). Significantly increasing or decreasing  
686 trends were determined based on a  $p$ -value  $<0.05$  and positive or negative Kendall  $\tau$  values to denote  
687 direction. No trend results were identified as  $p$ -values  $>0.05$ .

688 Fig 3 Annual mean dissolved inorganic carbon concentrations, dissolved organic carbon, particulate  
689 organic carbon and surface water  $p\text{CO}_{2(\text{aq})}$  for interior portions of the Everglades Protection Area between  
690 water years 1995 and 2015 (May 1, 1994 – April 30, 2015).

691 Fig. 4. Boxplot of annual mean dissolved inorganic concentration, dissolved organic carbon, particulate  
692 organic carbon and surface water  $p\text{CO}_{2(\text{aq})}$  concentration for each region of the Everglades Protection  
693 Area. Letters above box-and-whicker plots indicate statistical differences based on Dunn test results.

694 Fig. 5. Boxplot of Dissolved Organic Carbon and Dissolved Inorganic Carbon annual mean concentration  
695 ratio for each region of the Everglades Protection Area. Graphical representation of this data can be found  
696 in Supplemental Information.

697

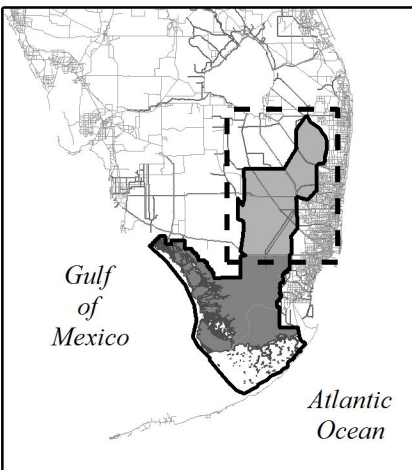

- △ Water Quality Station
- Stage Station
- Meteorologic Station
- Water Control Structures
- Canals
- Wildlife Management Areas
- Everglades Stormwater Treatment Areas
- Restoration Strategies Features (Circa 2017)
- Everglades Agricultural Area

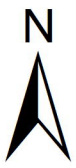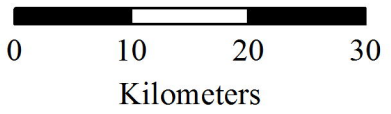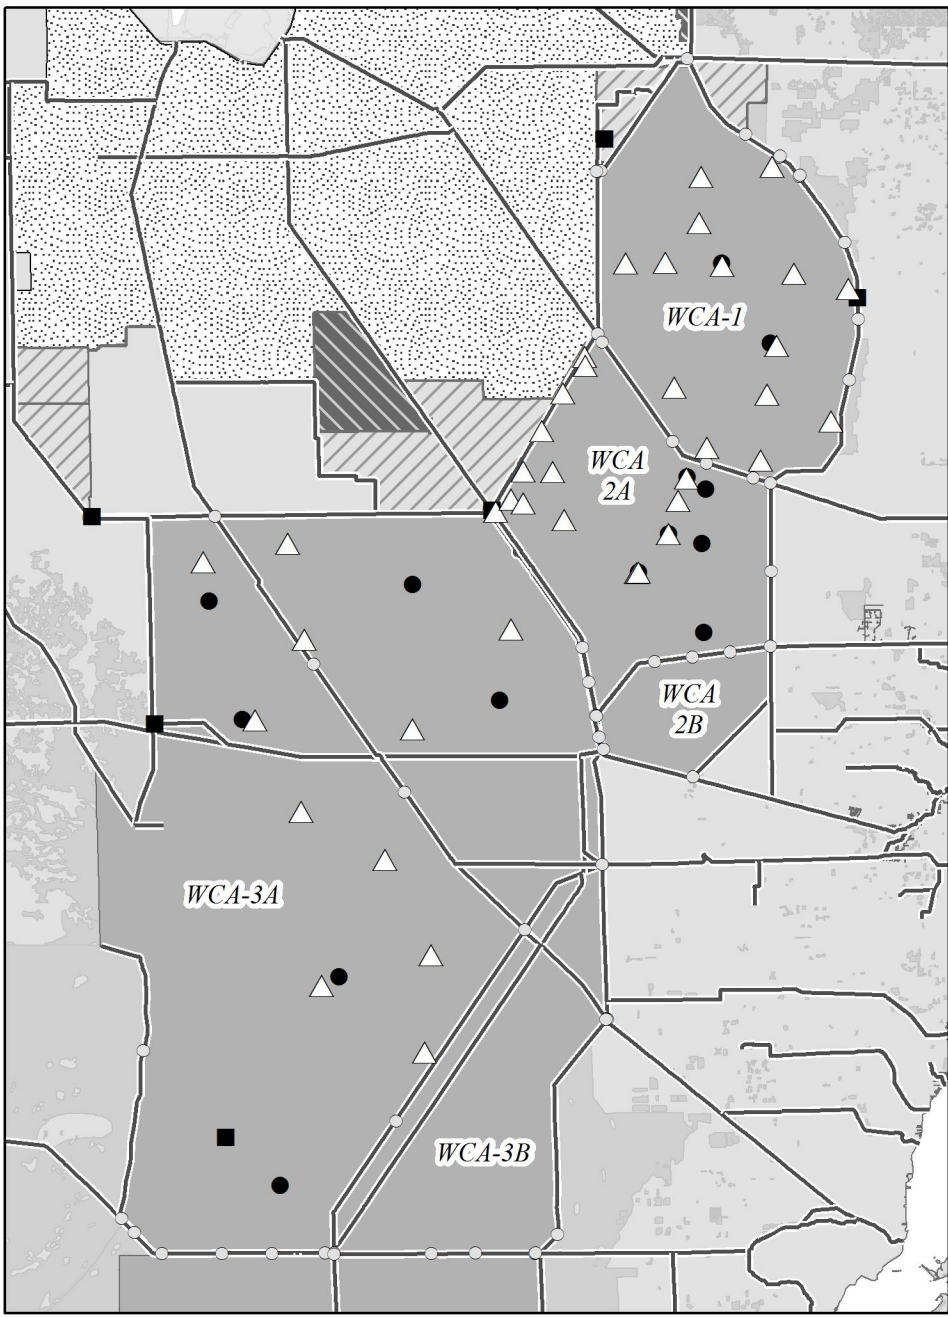

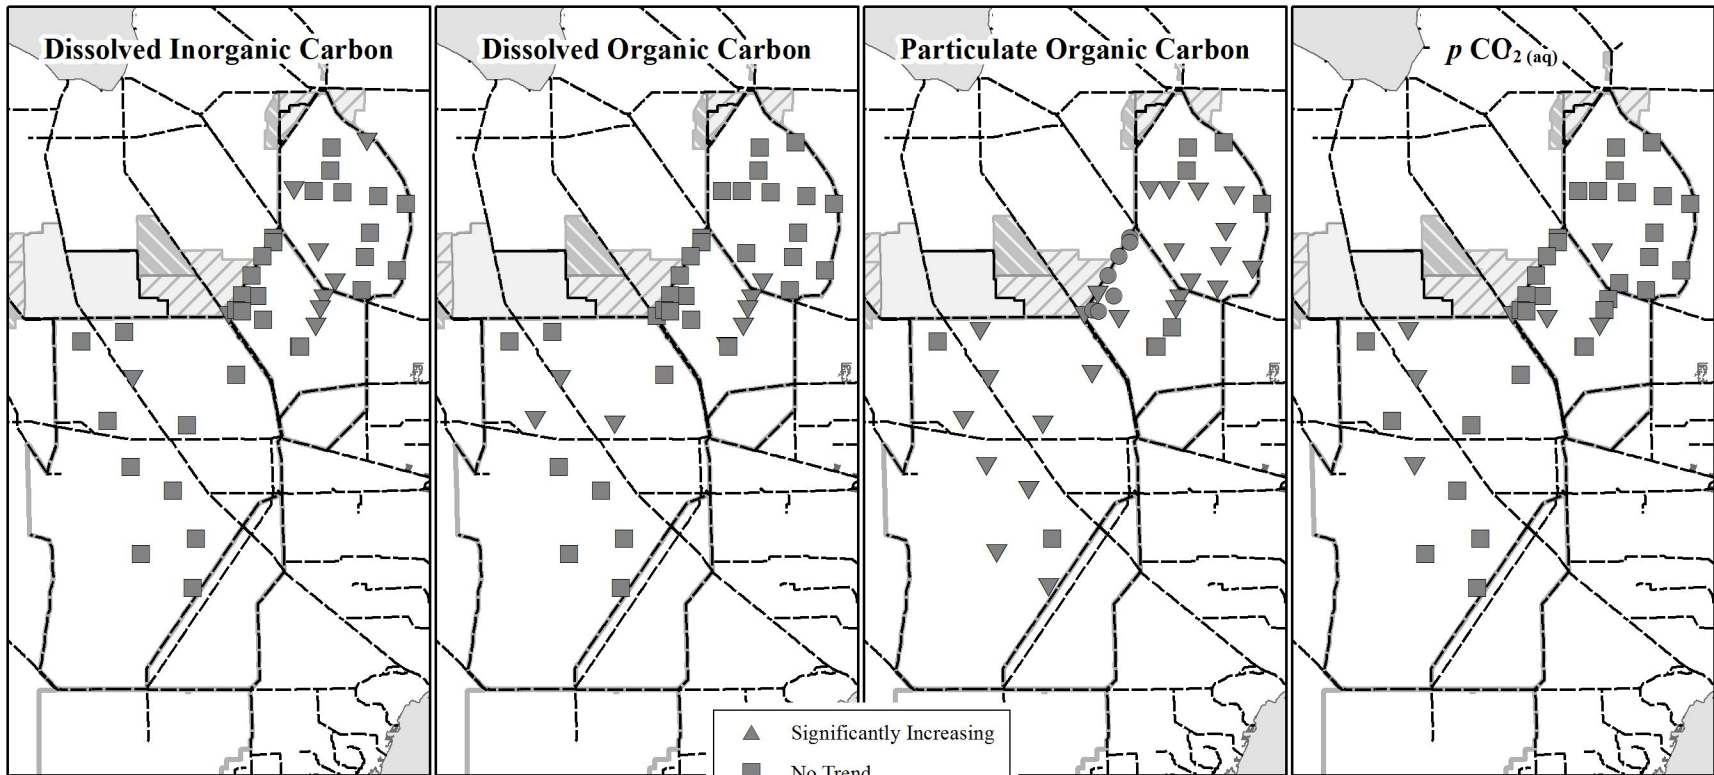

**Dissolved Inorganic Carbon**

**Dissolved Organic Carbon**

**Particulate Organic Carbon**

$p\text{CO}_2(\text{aq})$

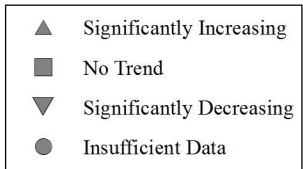

WCA-1

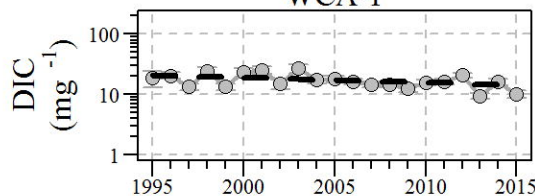

WCA-2

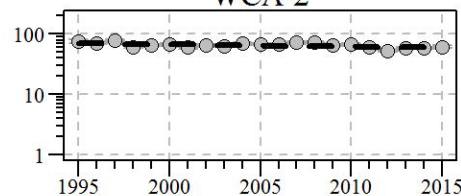

WCA-3

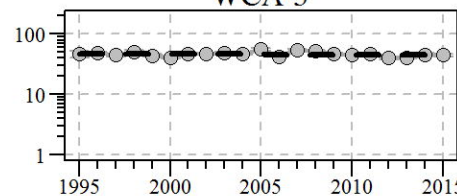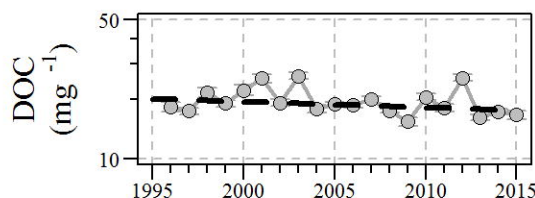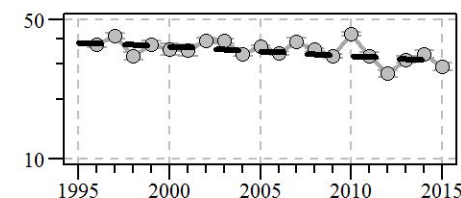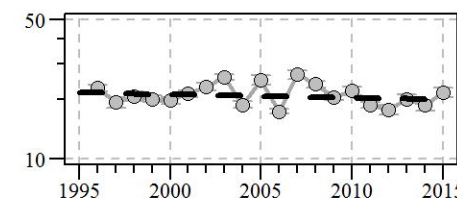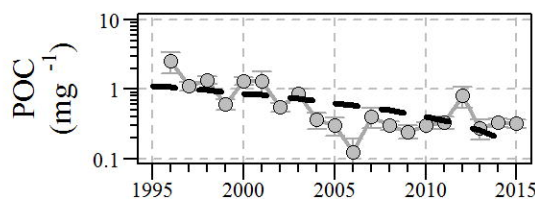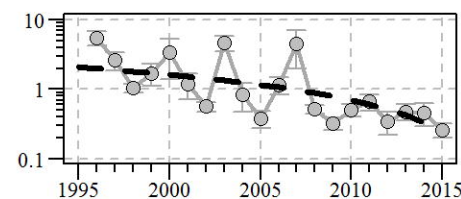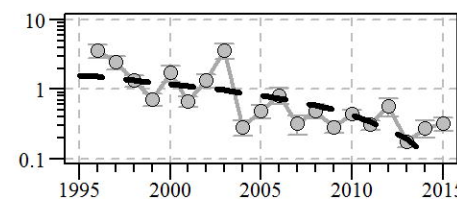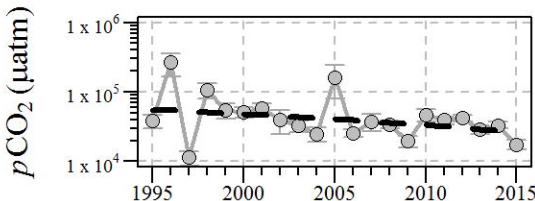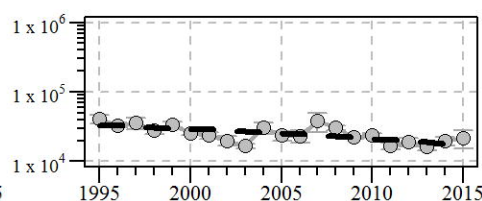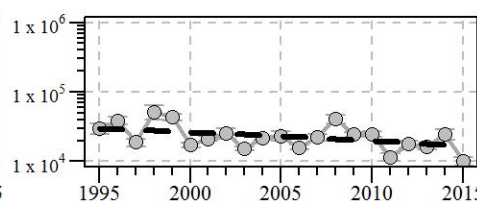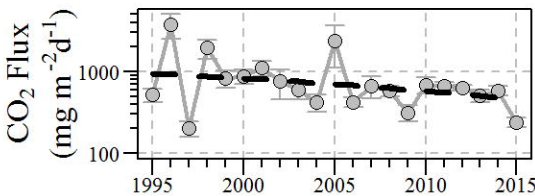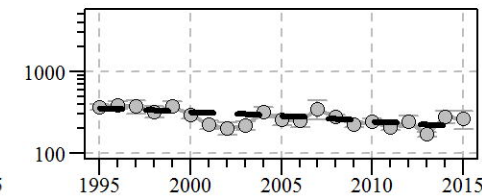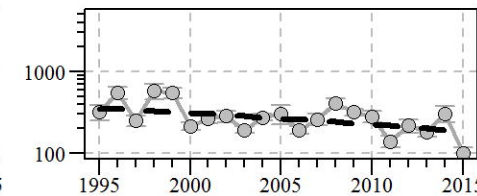

Water Year

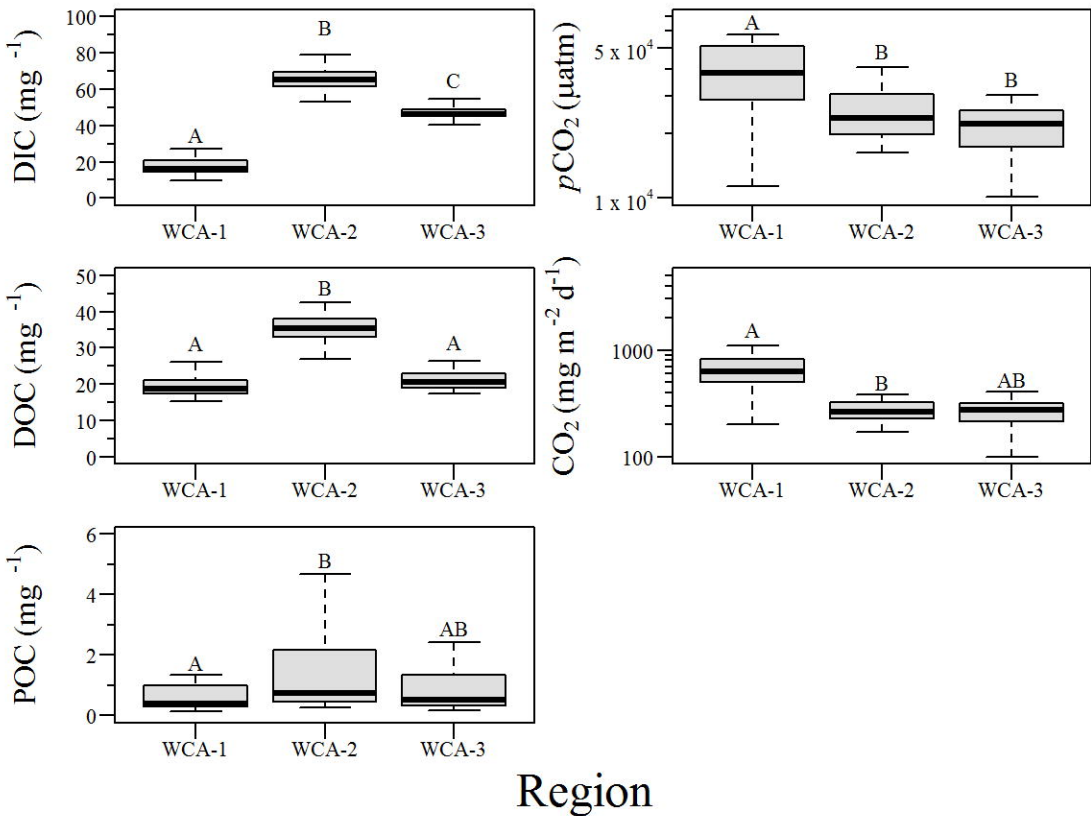



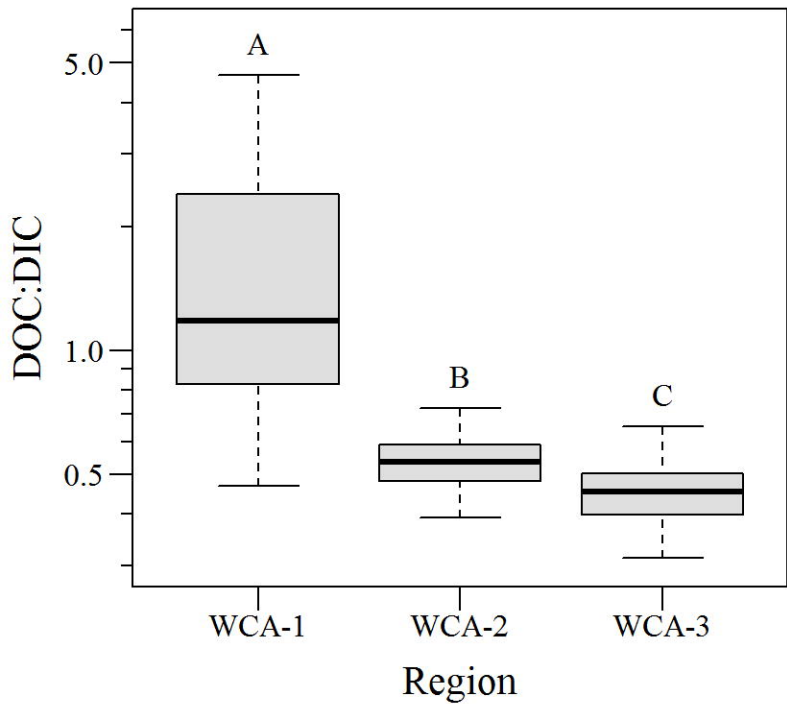

Table 1. Equations used to calculate surface water  $pCO_2$  concentrations and  $CO_2$  flux rates.

| Parameter                                                | Units                   | Equation                                                                             | Reference                  | Equation |
|----------------------------------------------------------|-------------------------|--------------------------------------------------------------------------------------|----------------------------|----------|
| Dissolved free $CO_2$ ( $CO_{2(aq)}$ )                   | $mol\ m^{-3}$           | $[CO_{2(aq)}] = \frac{DIC}{12.01} * [7.0 \times 10^6 \times \exp(-2.414 \times pH)]$ | (Wetzel and Likens 2000)   | 1        |
| Surface Water $pCO_2$                                    | atm                     | $pCO_2 = \frac{[CO_{2(aq)}]}{K_H}$                                                   | (Gu et al. 2008)           | 2        |
| $CO_2$ Dissolution Constant ( $K_H$ )                    | $mol\ m^{-3}\ atm^{-1}$ | $K_H = 0.0279T^2 - 2.3895T + 75.819$                                                 | (Gu et al 2008)            | 3        |
| $CO_2$ ( $CO_{2(atm)}$ ) at the top of the stagen layer. | $mol\ m^{-3}$           | $[CO_{2(atm)}] = K_H * pCO_{2(atm)}$                                                 | (Gu et al. 2011)           | 4        |
| $CO_2$ Flux ( $F_{CO_2}$ )                               | $mol\ m^{-2}\ s^{-1}$   | $F_{CO_2} = ([CO_{2(atm)}] - [CO_{2(aq)}]) \times \frac{D_{CO_2}}{z}$                | (Gu et al. 2011)           | 5        |
| $CO_2$ Diffusion Coefficient ( $D_{CO_2}$ )              | $m^2\ s^{-1}$           | $D_{CO_2} = \frac{(-12.2048 + 0.04752T)}{10^9}$                                      | (Akgerman and Gainer 1972) | 6        |
| Surface boundary layer thickness ( $z$ )                 | m                       | $z = \frac{10^{(2.56 - 0.133W)}}{10^6}$                                              | (Kling et al. 1992)        | 7        |

DIC= Dissolved Inorganic Carbon;  $K_H$  = Henry's Law  $CO_2$  dissolution constant; T=Temperature ( $^{\circ}C$ )

Table 2. Trend analysis results expressed as Kendall's  $\tau$ ,  $p$ -value (Thiel-Sen Slope) for annual mean dissolved inorganic carbon (DIC), dissolved organic carbon (DOC), particulate organic carbon (POC), surface water  $p\text{CO}_2$  ( $p\text{CO}_{2(\text{aq})}$ ) and  $\text{CO}_2$  flux rate for each region of the Everglades Protection Area between water years 1995 and 2015 (May 1, 1994 – April 30, 2015).

|                             | <b>Thiel-Sen Slope Units</b>                    | <b>WCA1</b>          | <b>WCA2</b>          | <b>WCA3</b>          |
|-----------------------------|-------------------------------------------------|----------------------|----------------------|----------------------|
| DIC                         | $\text{mg L}^{-1} \text{Yr}^{-1}$               | -0.30, 0.06 (-0.32)  | -0.34, <0.05 (-0.53) | -0.14, 0.39 (-0.13)  |
| DOC                         | $\text{mg L}^{-1} \text{Yr}^{-1}$               | -24, 0.15 (-0.12)    | -0.39, <0.05 (-0.37) | -0.11, 0.50 (-0.08)  |
| POC                         | $\text{mg L}^{-1} \text{Yr}^{-1}$               | -0.54, <0.01 (-0.05) | -0.58, <0.01 (-0.09) | -0.59, <0.01 (-0.08) |
| $p\text{CO}_{2(\text{aq})}$ | $\mu\text{atm Yr}^{-1}$                         | -0.30, 0.06 (-1454)  | -0.50, <0.01 (-792)  | -0.29, 0.07 (-670)   |
| $\text{CO}_2$ Flux          | $\text{mg m}^{-2} \text{d}^{-1} \text{Yr}^{-1}$ | -0.31, <0.05 (-25.0) | -0.40, <0.05 (-7.4)  | -0.34, <0.05 (-8.3)  |

Table 3. Mean  $\pm$  standard error surface water parameters observed during this study within each portion of the Everglades Protection Area between water years 1995-2015 (May 1, 1994 – April 30, 2015).

| <b>Parameter</b>            | <b>Units</b>                         | <b>WCA-1</b>       | <b>WCA-2</b>       | <b>WCA-3</b>     |
|-----------------------------|--------------------------------------|--------------------|--------------------|------------------|
| Alkalinity                  | mg CaCO <sub>3</sub> L <sup>-1</sup> | 44.1 $\pm$ 0.9     | 248.4 $\pm$ 1.4    | 168.4 $\pm$ 0.9  |
| Water Temperature           | °C                                   | 23.4 $\pm$ 0.1     | 24.1 $\pm$ 0.1     | 24.1 $\pm$ 0.1   |
| pH                          | SU                                   | 6.6 $\pm$ 0.01     | 7.3 $\pm$ 0.01     | 7.2 $\pm$ 0.01   |
| Specific Conductance        | $\mu$ S cm <sup>-1</sup>             | 213.6 $\pm$ 3.8    | 936.5 $\pm$ 5.9    | 517.5 $\pm$ 3.6  |
| Dissolved Inorganic Carbon  | mg C L <sup>-1</sup>                 | 17.2 $\pm$ 0.6     | 67.2 $\pm$ 0.7     | 47.0 $\pm$ 0.5   |
| Dissolved Organic Carbon    | mg C L <sup>-1</sup>                 | 19.4 $\pm$ 0.2     | 35.8 $\pm$ 0.3     | 21.1 $\pm$ 0.2   |
| Particulate Organic Carbon  | mg C L <sup>-1</sup>                 | 0.65 $\pm$ 0.05    | 1.64 $\pm$ 0.20    | 1.04 $\pm$ 0.09  |
| Total Phosphorus            | $\mu$ g P L <sup>-1</sup>            | 9.1 $\pm$ 0.3      | 25.5 $\pm$ 1.2     | 8.9 $\pm$ 0.2    |
| Total Nitrogen              | mg N L <sup>-1</sup>                 | 1.19 $\pm$ 0.01    | 2.03 $\pm$ 0.02    | 1.33 $\pm$ 0.01  |
| <i>p</i> CO <sub>2,aq</sub> | $\mu$ atm                            | 54,379 $\pm$ 6,445 | 26,714 $\pm$ 1,020 | 24,963 $\pm$ 984 |
| CO <sub>2</sub> Flux        | mg m <sup>-2</sup> d <sup>-1</sup>   | 876.2 $\pm$ 96.4   | 285.1 $\pm$ 10.1   | 304.8 $\pm$ 13.4 |

Table 4. Spearman correlation analysis results of monthly mean surface water *carbon variables* and various water quality parameters. Values are represented as spearman's rho ( $\rho$ -value). Correlations that are not statistically significant are identified in bold text.

|                            | <b>Parameter</b>     | <b>WCA-1</b>        | <b>WCA-2</b>         | <b>WCA-3</b>        |
|----------------------------|----------------------|---------------------|----------------------|---------------------|
| Dissolved Inorganic Carbon | Stage Elevation      | <b>0.19 (0.14)</b>  | <b>-0.25 (0.06)</b>  | -0.49 (<0.01)       |
|                            | Water Temperature    | <b>0.06 (0.63)</b>  | -0.31 (<0.01)        | -0.57 (<0.01)       |
|                            | Total Phosphorus     | 0.39 (<0.01)        | 0.34 (<0.05)         | <b>-0.23 (0.07)</b> |
|                            | Total Nitrogen       | 0.62 (<0.01)        | 0.65 (<0.01)         | 0.59 (<0.01)        |
|                            | Specific Conductance | 0.74 (<0.01)        | 0.67 (<0.01)         | 0.65 (<0.01)        |
| Dissolved Organic Carbon   | Stage Elevation      | <b>0.07 (0.61)</b>  | -0.33 (<0.05)        | -0.28 (<0.05)       |
|                            | Water Temperature    | <b>-0.08 (0.52)</b> | <b>-0.14 (0.30)</b>  | <b>-0.03 (0.79)</b> |
|                            | Total Phosphorus     | <b>0.25 (0.05)</b>  | 0.38 (<0.01)         | <b>0.009 (0.95)</b> |
|                            | Total Nitrogen       | 0.78 (<0.01)        | 0.67 (<0.01)         | 0.72 (<0.01)        |
|                            | Specific Conductance | 0.74 (<0.01)        | 0.52 (<0.01)         | 0.60 (<0.01)        |
| Particulate Organic Carbon | Stage Elevation      | <b>-0.23 (0.10)</b> | <b>-0.007 (0.96)</b> | <b>0.14 (0.28)</b>  |
|                            | Water Temperature    | <b>-0.15 (0.26)</b> | <b>-0.12 (0.37)</b>  | <b>-0.18 (0.18)</b> |
|                            | Total Phosphorus     | <b>0.08 (0.55)</b>  | 0.40 (<0.01)         | 0.37 (<0.01)        |
|                            | Total Nitrogen       | <b>0.19 (0.16)</b>  | <b>0.17 (0.23)</b>   | <b>-0.11 (0.41)</b> |
|                            | Specific Conductance | 0.30 (<0.05)        | <b>0.04 (0.79)</b>   | -0.32 (<0.05)       |
| $p\text{CO}_{2,\text{aq}}$ | Stage Elevation      | <b>-0.05 (0.20)</b> | <b>0.25 (0.06)</b>   | <b>0.19 (0.14)</b>  |
|                            | Water Temperature    | <b>0.25 (0.05)</b>  | 0.35 (<0.01)         | <b>0.21 (0.10)</b>  |
|                            | Total Phosphorus     | 0.30 (<0.05)        | 0.48 (<0.01)         | <b>0.22 (0.09)</b>  |
|                            | Total Nitrogen       | <b>0.22 (0.10)</b>  | <b>0.08 (0.51)</b>   | <b>0.09 (0.48)</b>  |
|                            | Specific Conductance | <b>0.12 (0.38)</b>  | <b>0.02 (0.91)</b>   | <b>-0.13 (0.31)</b> |
